# Supplementary material
Source: PubMed Central journal article supplement (PMC4204780)
Supplement: supp_mcu066_mcu066supp_fig2.pdf [file supp_mcu066_mcu066supp_fig2.pdf]

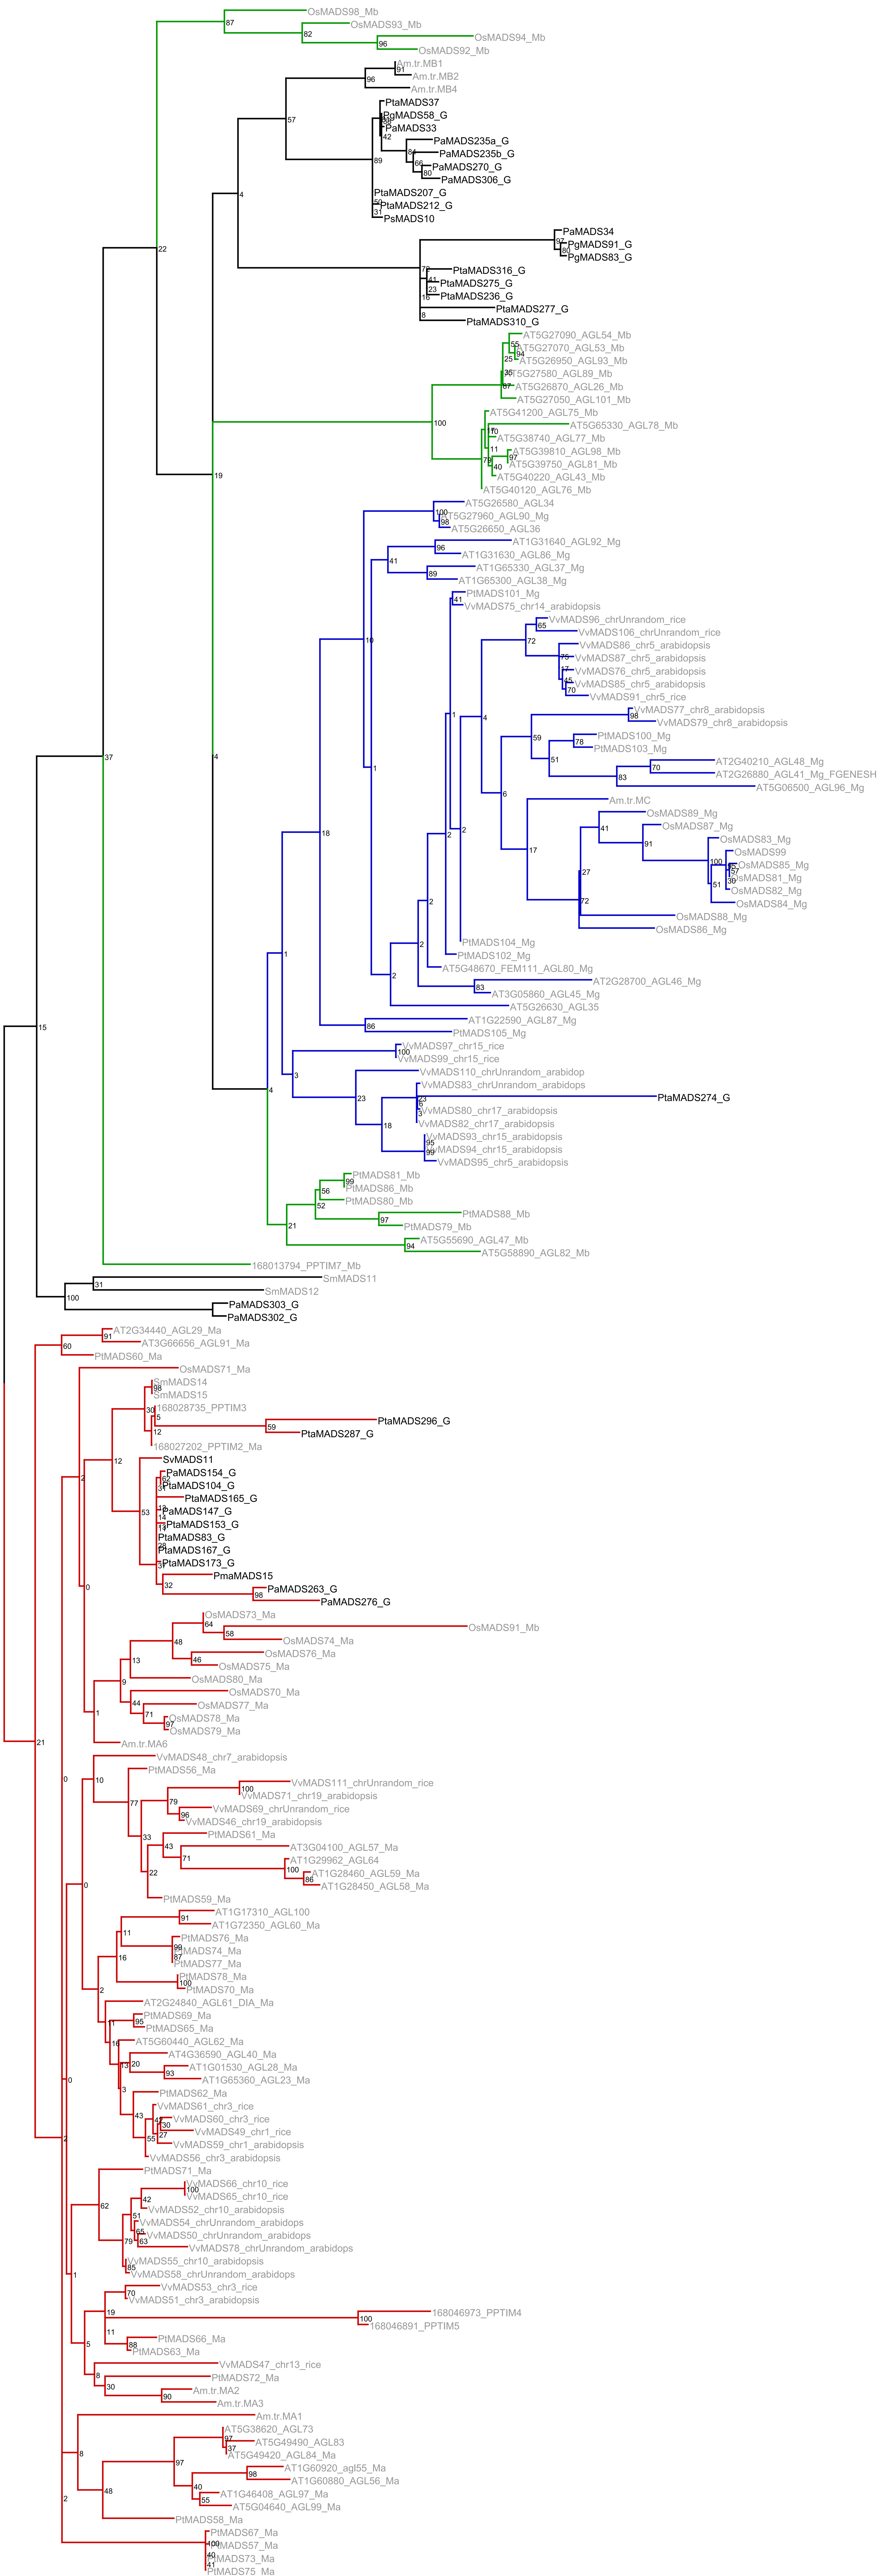

**Fig. S2: RAxML-Phylogeny of Type I MADS-box genes in plants.**

The clades of *ML*- and *My*-like genes in red and blue, respectively. Genes annotated as *Mβ*-like genes before (Arora et al., 2007; Parenicova et al., 2003; Leseberg et al., 2006) do not form a clade in our phylogeny, but are split in several clades which are colored in green. Gene names of genes from species not belonging to gymnosperms are colored in grey. Gene names of genes from gymnosperms are as shown in Table 1 and Supplementary Data Table S1. Gymnosperm genes for which the name ends with "\_G" are solely derived from genomic data and no expression evidence was found. Gene names starting with AT, Arabidopsis thaliana; Am.tr. and At, *Arabidopsis thaliana*; Am.tr. and At, *Arabidopsis thaliana*; Os, *Oryza sativa*; PtMADS, *Populus trichocarpa*; Sm, *Selaginella moellendorffii*; Vv, *Vitis vinifera*. Gene names containing CgMADS1, *Chara globularis*; CRM or CerMADS, *Ceratopteris richardii*; LAMB, *Lycopodium annotinum*; MpMADS1, *Marchantia polymorpha*; PPTIM or PpMADS or PPM, *Physcomitrella patens*; SrMADS1, *Selaginella remotifolia*. For genes from ferns the corresponding species are given after the gene name. The numbers at the nodes represent bootstrap values.
