# Supplementary material
Source: PubMed Central journal article supplement (PMC4204780)
Supplement: supp_mcu066_mcu066supp_fig10.pdf [file supp_mcu066_mcu066supp_fig10.pdf]

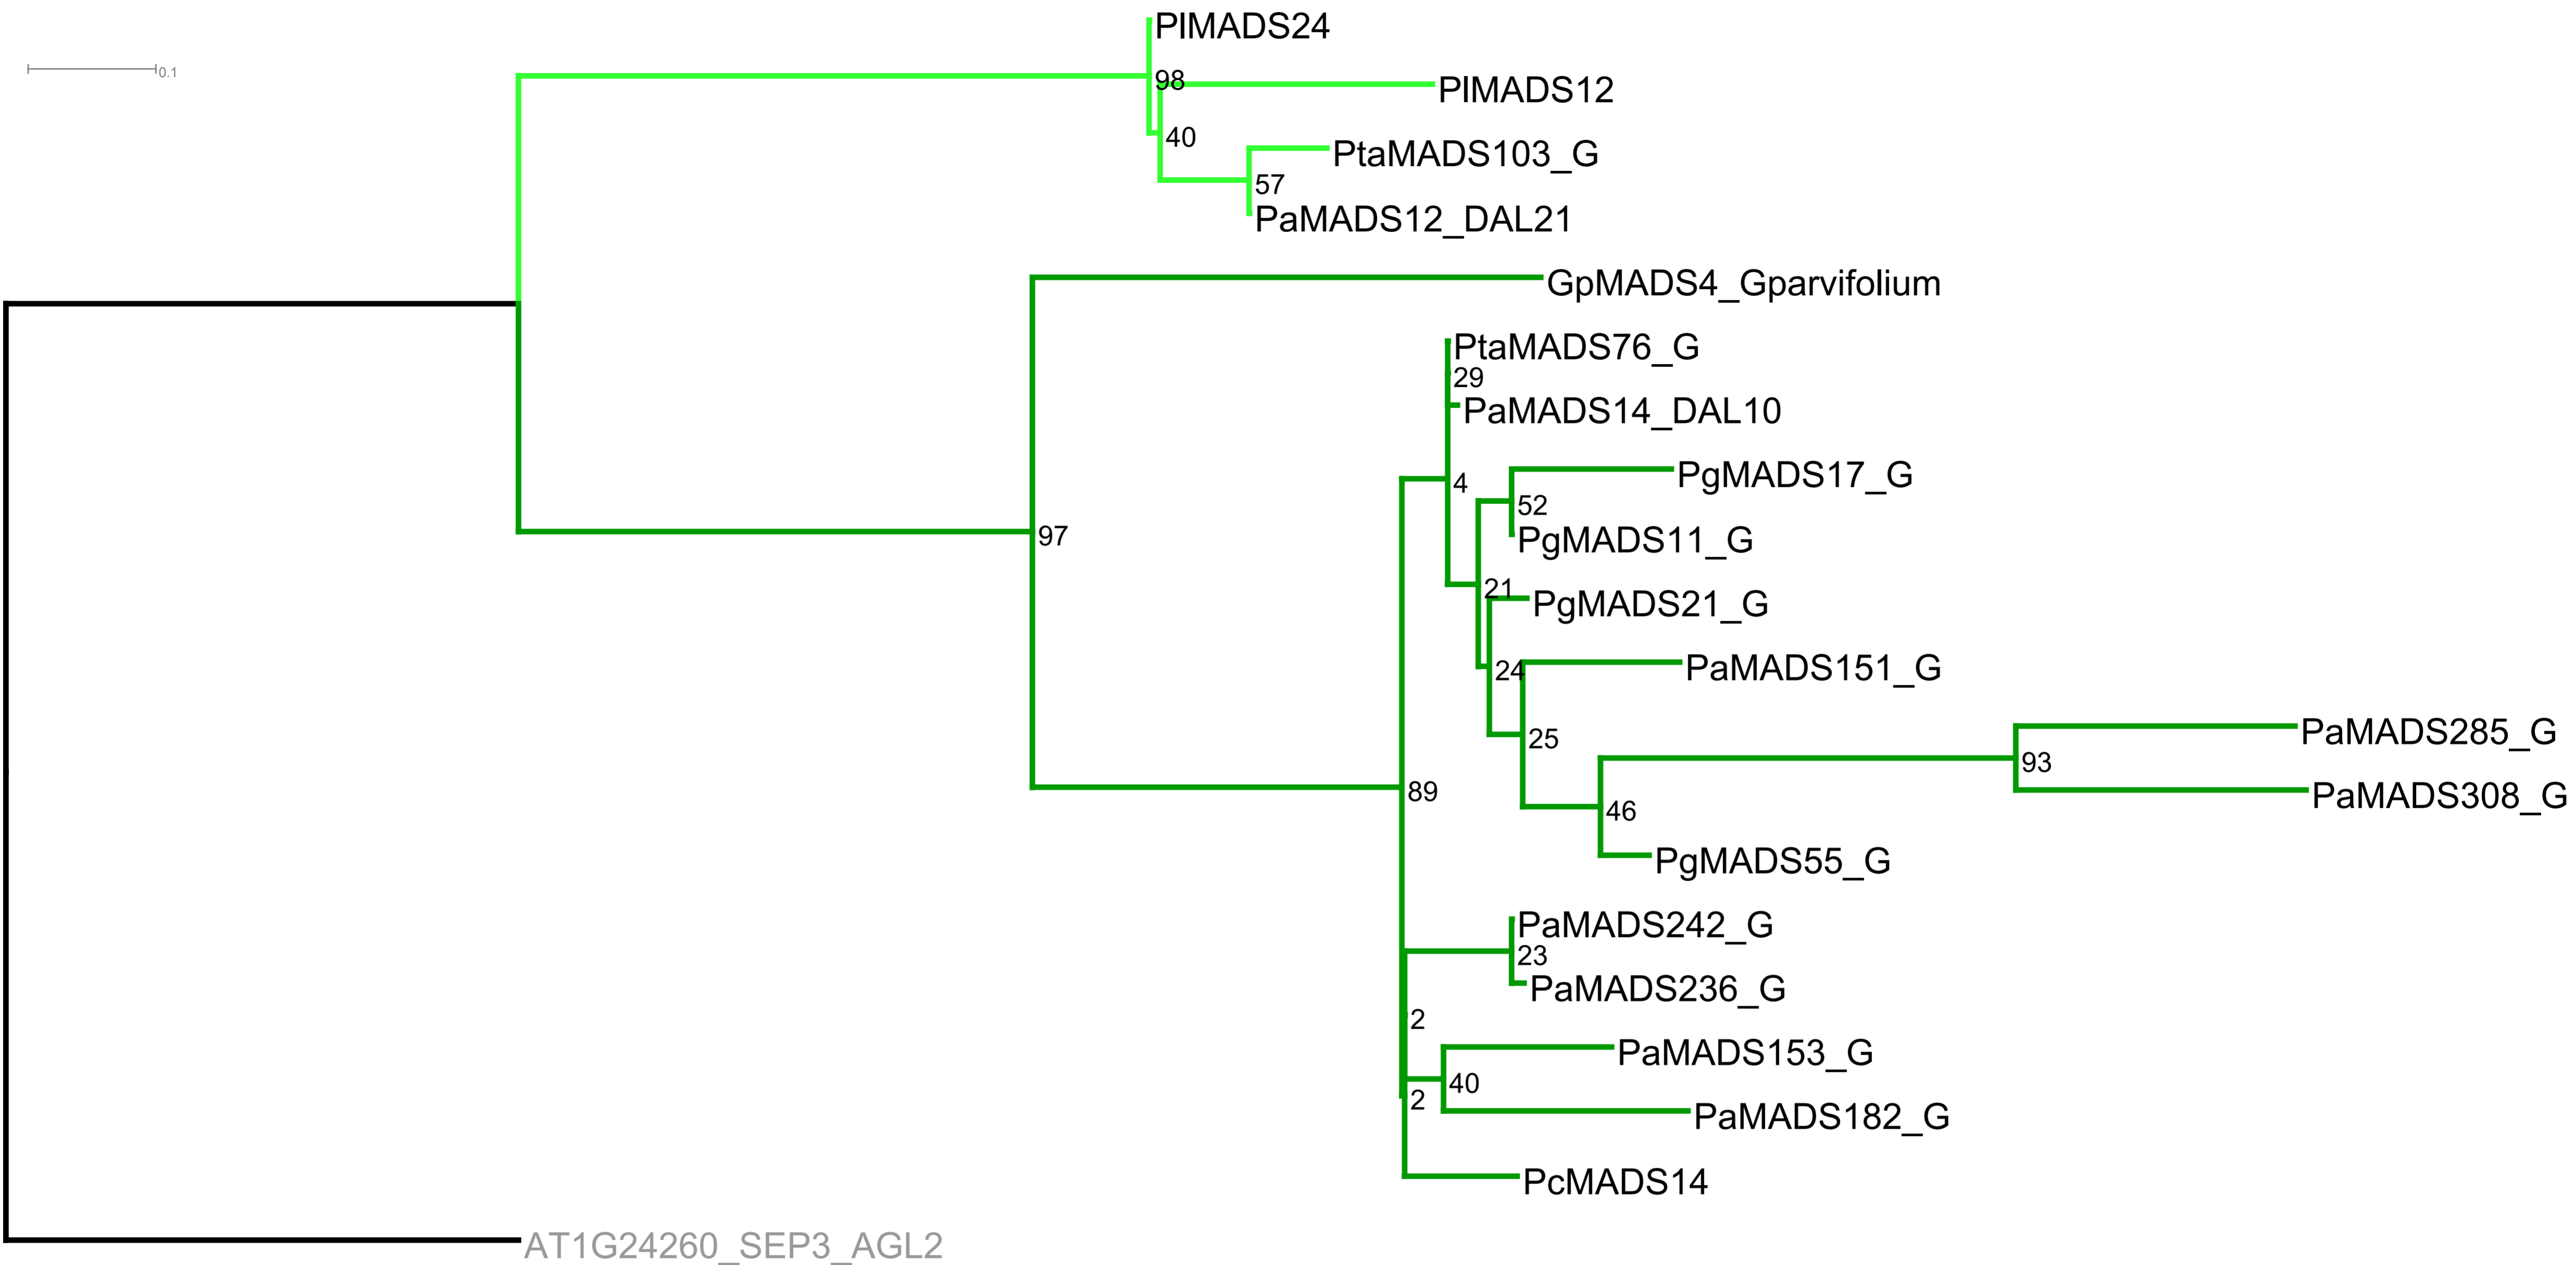

**Fig. S11a: RAxML-Phylogeny of GpMADS4-like MADS-box genes.**

The subclade of DAL21-like genes is colored light green and the subclade of GpMADS4-like genes is colored dark green. Gene names of genes from species not belonging to gymnosperms are colored in grey. Gene names of genes from gymnosperms are as shown in Table 1 and Supplementary Data Table S1. Gymnosperm genes for which the name ends with “\_G” are solely derived from genomic data and no expression evidence was found. Gene names starting with AT, *Arabidopsis thaliana*. The numbers at the nodes represent bootstrap values.

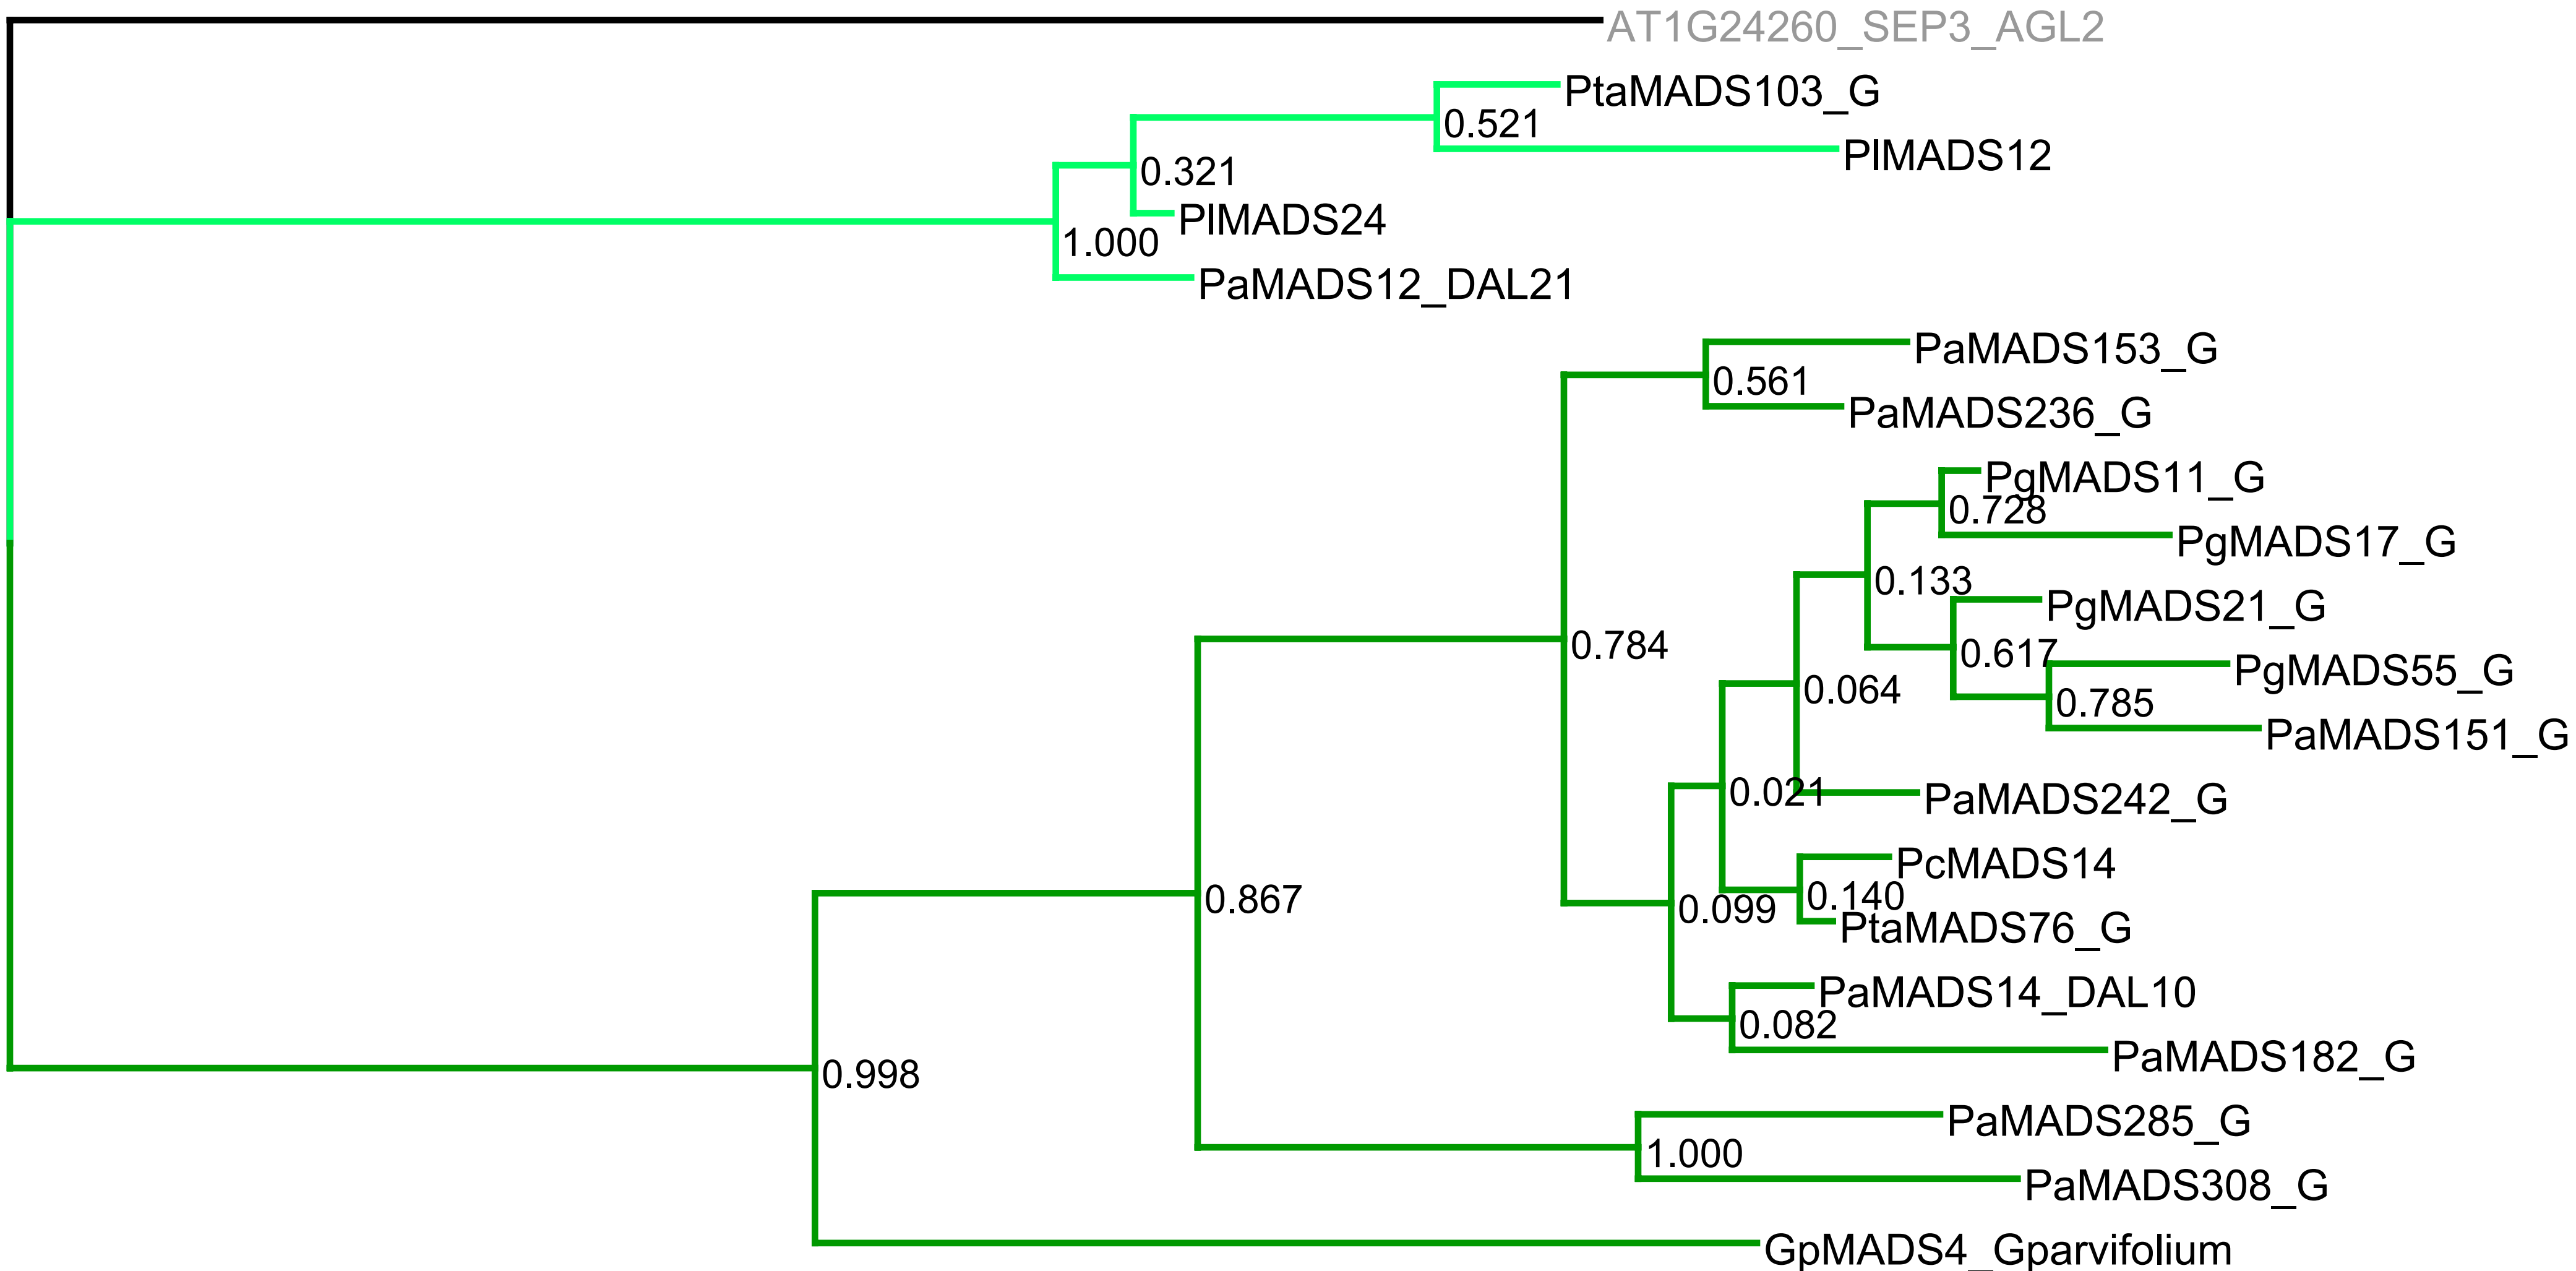

### Fig. S11b: MrBayes-Phylogeny of GpMADS4-like MADS-box genes.

The subclade of DAL21-like genes is colored light green and the subclade of GpMADS4-like genes is colored dark green. Gene names of genes from species not belonging to gymnosperms are colored in grey. Gene names of genes from gymnosperms are as shown in Table 1 and Supplementary Data Table S1. Gymnosperm genes for which the name ends with “\_G” are solely derived from genomic data and no expression evidence was found. Gene names starting with AT, *Arabidopsis thaliana*. The numbers at the nodes represent bootstrap values.
